# Supplementary material for: Burden of diseases and injuries attributable to alcohol consumption in the Middle East and North Africa region, 1990–2019
Source: PubMed Central journal article supplement (PMC9652338; doi:10.1038/s41598-022-22901-x), 2022-11-11
Supplement: 41598_2022_22901_MOESM2_ESM.pdf [file 41598_2022_22901_MOESM2_ESM.pdf]

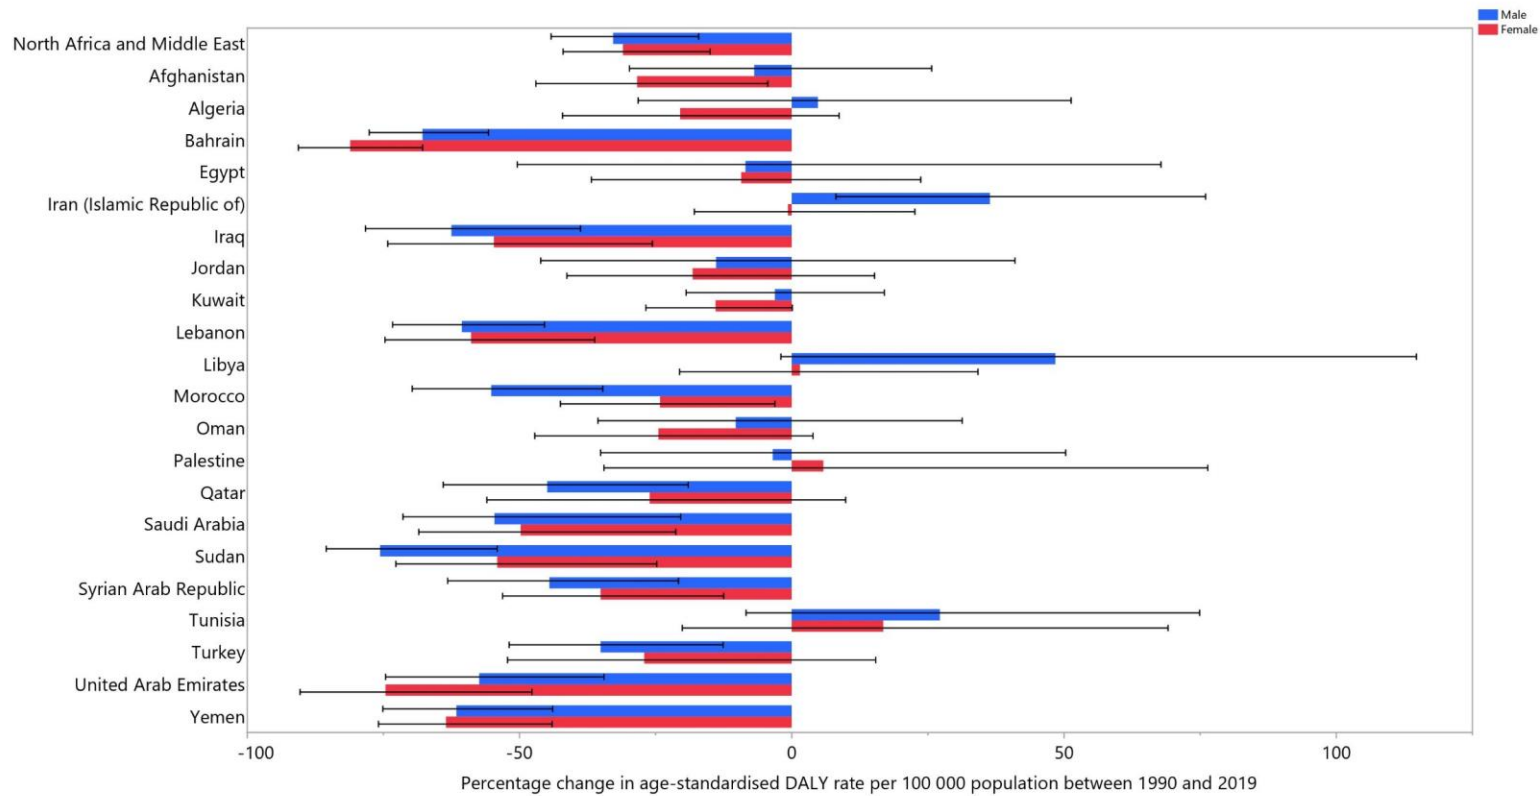

**Figure S2:** The percentage in the age-standardised DALYs rate of disease and injuries attributable to alcohol consumption in the Middle East and North Africa region from 1990 to 2019, by sex and country. DALY=disability-adjusted-life-years. (Generated from data available from <http://ghdx.healthdata.org/gbd-results-tool>).
