# Supplementary material for: Burden of diseases and injuries attributable to alcohol consumption in the Middle East and North Africa region, 1990–2019
Source: PubMed Central journal article supplement (PMC9652338; doi:10.1038/s41598-022-22901-x), 2022-11-11

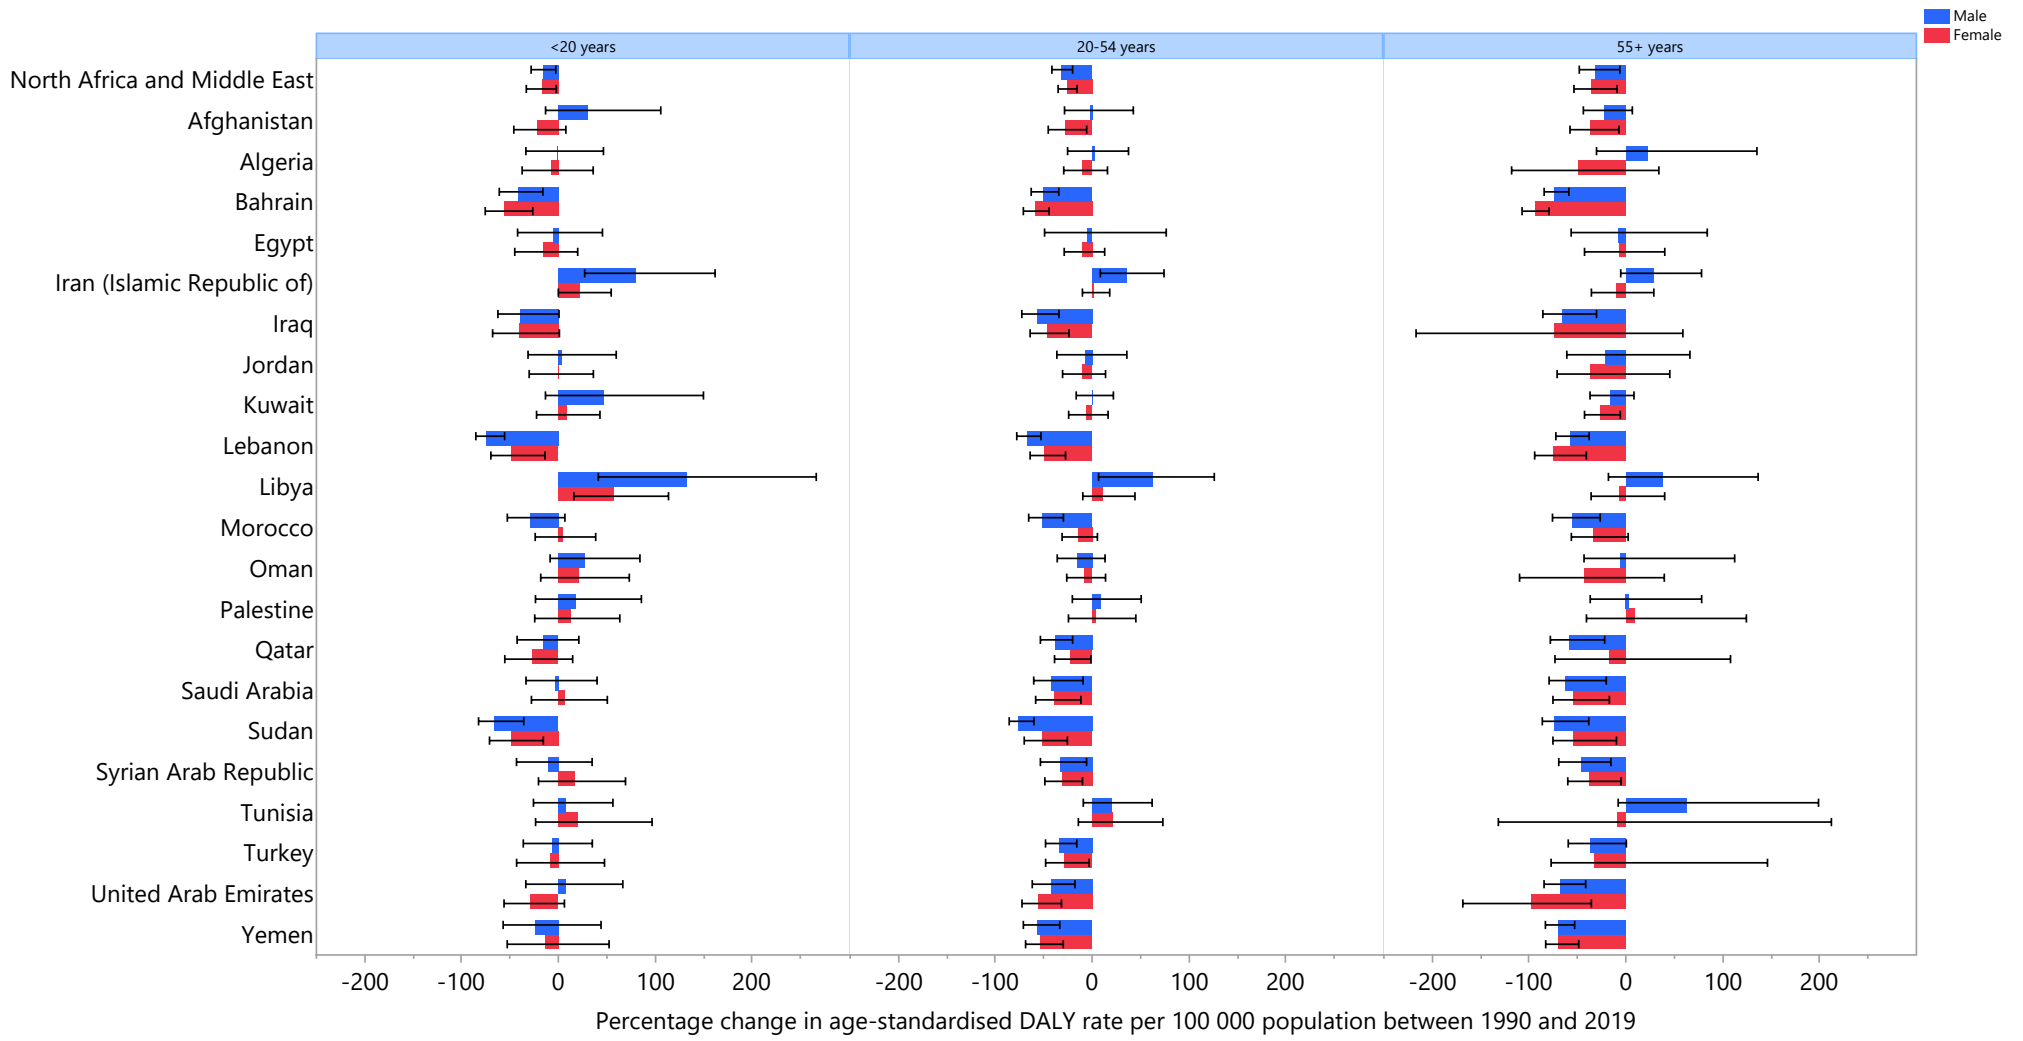

Supplement: 41598_2022_22901_MOESM4_ESM.pdf [file 41598_2022_22901_MOESM4_ESM.pdf]
